# Supplementary material for: Performance of complex visual tasks using simulated prosthetic vision via augmented-reality glasses
Source: PubMed Central journal article supplement — J Vis. 2019 Nov 26;19(13):22. doi: 10.1167/19.13.22 (PMC6880846; doi:10.1167/19.13.22), 2019-11-26
Supplement: jovi-19-13-07_s01.pdf [file jovi-19-13-07_s01.pdf]

# Supp. Figure 1

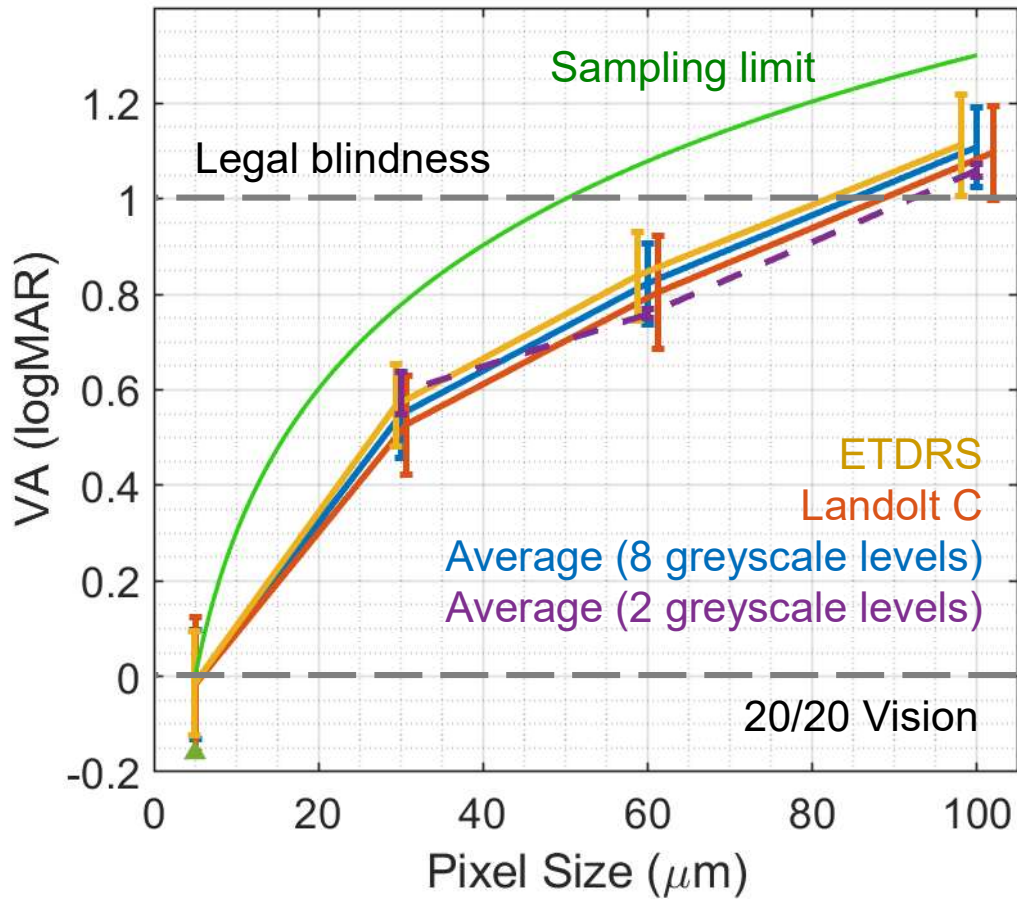

**Supp. Figure 1.** Single-character visual acuity ( $n=13$  for 30 and 60  $\mu\text{m}$  pixels;  $n=19$  for natural vision and 100  $\mu\text{m}$  pixels). In addition to the data presented in Figure 3, the results of ETDRS and Landolt C VA are shown separately here. Error bars are presented in terms of s.d.
